# Supplementary material
Source: Springer Nature journal article supplement (https://www.springermedizin.de/resource/supplementary/12985_2009_602_MOESM12_ESM.pdf/9608544)
Supplement: MOESM12 [file 9608544]

Colour Legend for Genogroups:  
 Genogroup 1 in Genotype I  
 Genogroup 2 in Genotype I  
 Genogroup 1 in Genotype II  
 Genogroup 2 in Genotype II

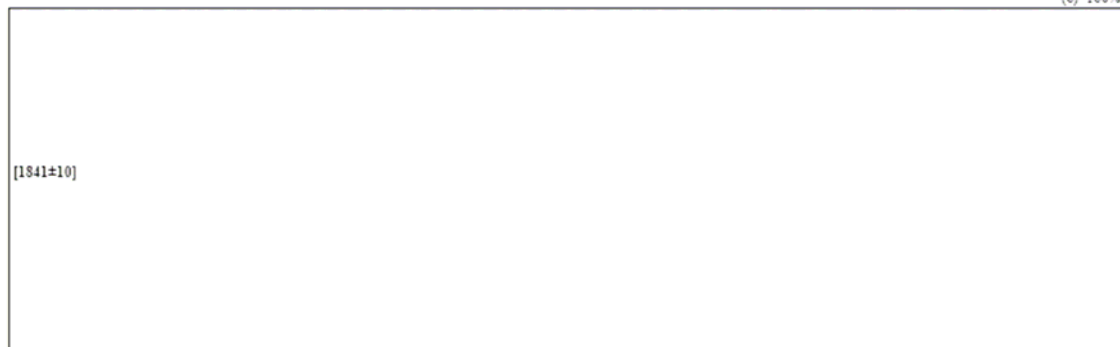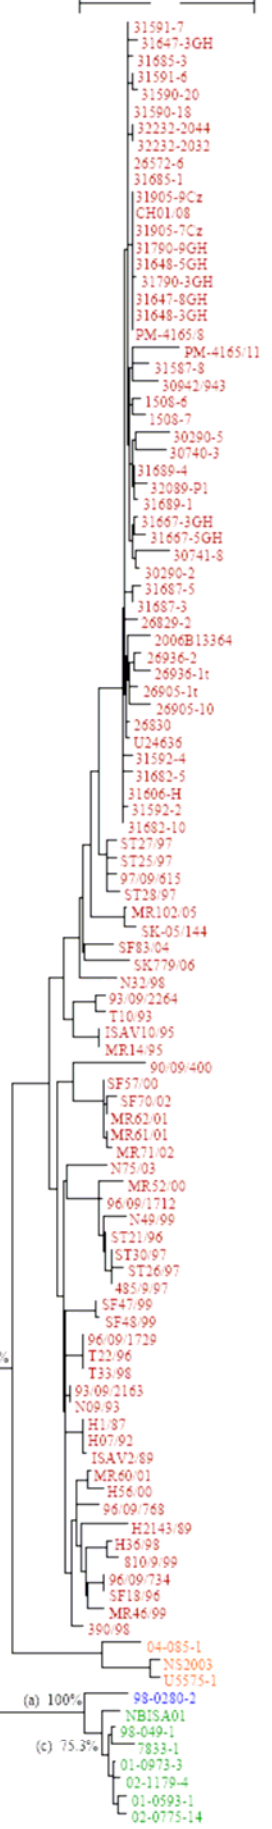

[1841±10]
